# Supplementary material for: Free-floating hydrogel-based rafts supporting a microarray of functional entities at fluid interfaces
Source: Royal Society of Chemistry journal article supplement (doi:10.1039/c2sm07485k), 2012-01-01
Supplement: c2sm07485k.pdf [file c2sm07485k.pdf]

1 Electronic Supplementary Information (ESI) for Soft Matter

2 This journal is (C) The Royal Society of Chemistry 2011

3

4 **Free-floating hydrogel-based rafts carrying a microarray of**  
5 **functional entities at fluid interfaces**

6 *René Hensel and Hans-Georg Braun*\*

7 Max Bergmann Centre of Biomaterials, Leibniz Institute of Polymer Research Dresden,  
8 01069 Dresden, Germany

9 \*Corresponding author.

10 Phone: +49 351 4658 548; Fax: +49 351 4658 533; E-mail: [braun@ipfdd.de](mailto:braun@ipfdd.de)

## 1 Supplementary Figures

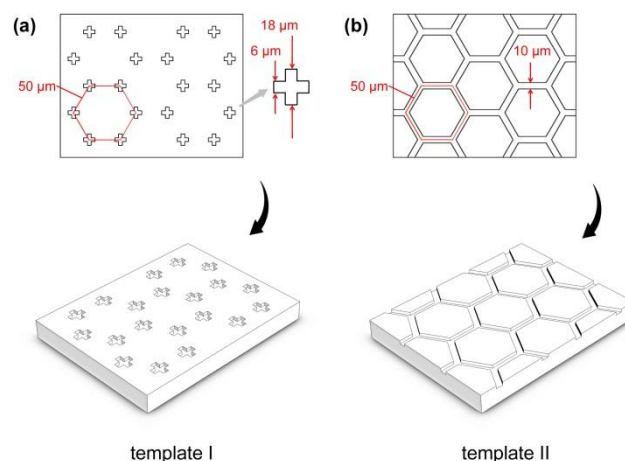

2

template I

template II

3 **Figure S1. Layout of the elastomeric perfluoropolyether dimethacrylate (PFPEdma)**  
4 **templates. (a)** Silicon master structure and the corresponding elastomeric PFPEdma  
5 **I** with an array of cross-shaped motives. **(b)** Silicon master structure and the corresponding  
6 **elastomeric PFPEdma template II** with a protrusive comb-shaped mesh structure.

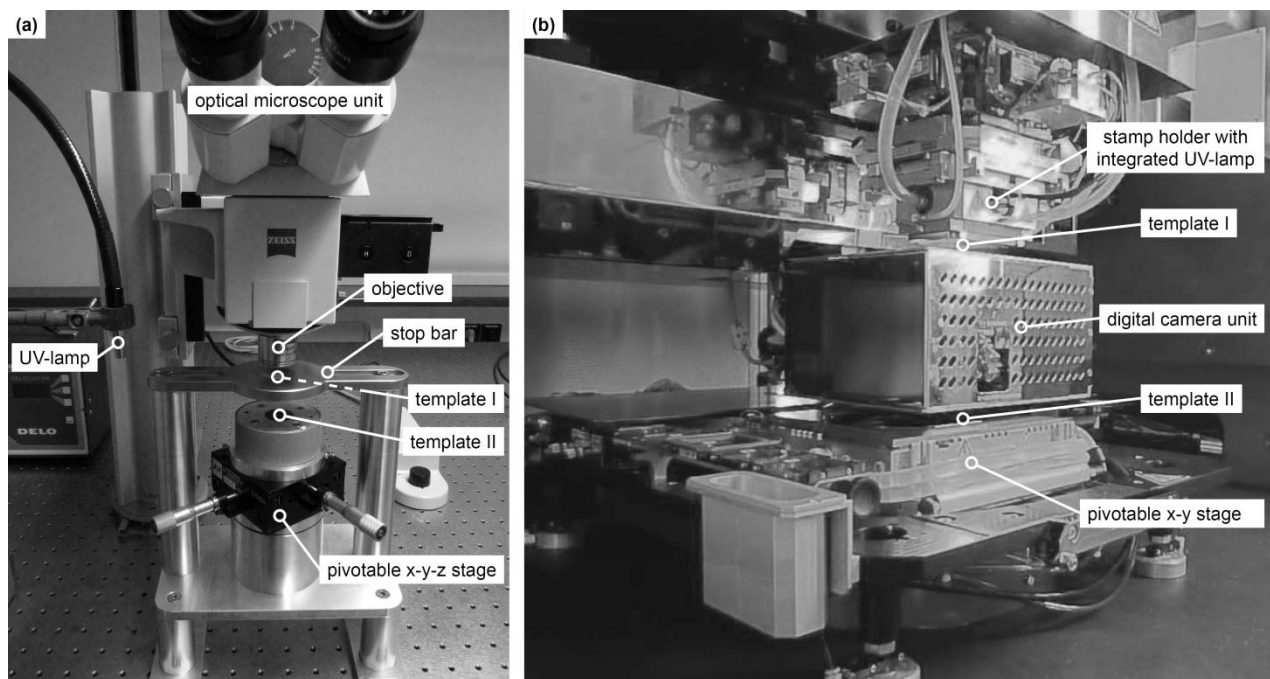

1  
2 **Figure S2. Layout of the imprint stations. (a)** Self-made set-up mounted on an optical  
3 microscope. **(b)** Fully automated Nano Imprinting Stepper NPS300.

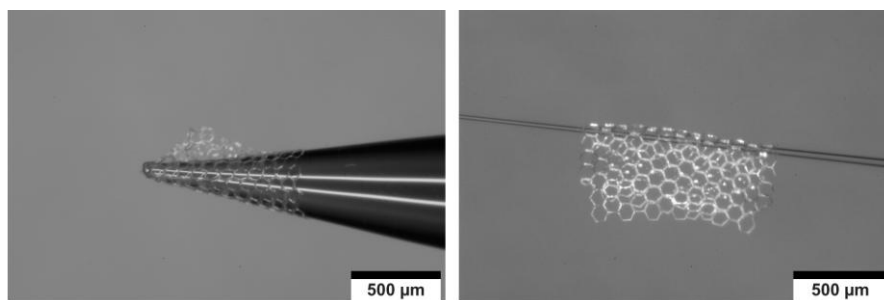

1

2 **Figure S3. Demonstration of the mechanical flexibility of the raft.** The raft based on a  
3 mesh structure wrap the tip of glass capillaries without breaking.

1 **Supplementary Movie**

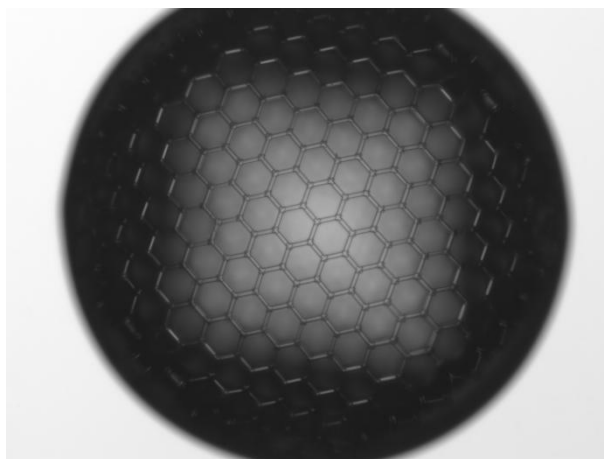

2

3 **Movie M1. Free-floating raft at the water-air interface of an evaporating sessile droplet.**
